# Supplementary material for: Diffusion tractography reveals pervasive asymmetry of cerebral white matter tracts in the bottlenose dolphin (Tursiops truncatus)
Source: Springer Nature journal article supplement (doi:10.1007/s00429-017-1525-9), 2017-11-30
Supplement: MOESM1 [file 15268904]

**Online Resource 1** Repeated measures mean and standard deviation ( $\pm$  SD) for macrostructural tract-specific parameters of volume, fiber number, and mean fiber length in *T. truncatus* (N=1)

| Tracts         | Volume (mm <sup>3</sup> ) | Fiber number   | Mean fiber length (mm) |
|----------------|---------------------------|----------------|------------------------|
|                | Mean $\pm$ SD             | Mean $\pm$ SD  | Mean $\pm$ SD          |
| <b>ARC</b>     |                           |                |                        |
| Left           | 2734 $\pm$ 0              | 150 $\pm$ 0    | 110 $\pm$ 0            |
| Right          | 4760 $\pm$ 0              | 570 $\pm$ 0    | 105 $\pm$ 0            |
| <b>ATR</b>     |                           |                |                        |
| Left           | 19653 $\pm$ 1298          | 3955 $\pm$ 355 | 60.0 $\pm$ 0.5         |
| Right          | 18980 $\pm$ 278           | 2734 $\pm$ 75  | 50.9 $\pm$ 0.1         |
| <b>CCA</b>     |                           |                |                        |
| Left           | 5839 $\pm$ 149            | 1009 $\pm$ 68  | 45.3 $\pm$ 1.4         |
| Right          | 3313 $\pm$ 241            | 530 $\pm$ 70   | 36.5 $\pm$ 1.7         |
| <b>CCFM</b>    |                           |                |                        |
| CCFM           | 10894 $\pm$ 168           | 2321 $\pm$ 56  | 25.1 $\pm$ 0.3         |
| CCFMBi         | 4775 $\pm$ 93             | 807 $\pm$ 56   | 31.0 $\pm$ 0.6         |
| <b>CG</b>      |                           |                |                        |
| Left           | 3895 $\pm$ 5              | 882 $\pm$ 1    | 57.7 $\pm$ 0           |
| Right          | 1962 $\pm$ 31             | 374 $\pm$ 6    | 39.1 $\pm$ 0.1         |
| <b>EC</b>      |                           |                |                        |
| Left           | 6727 $\pm$ 305            | 1396 $\pm$ 71  | 40.9 $\pm$ 0.9         |
| Right          | 4866 $\pm$ 248            | 646 $\pm$ 52   | 31.5 $\pm$ 0.5         |
| <b>FX</b>      |                           |                |                        |
|                | 2355 $\pm$ 96             | 386 $\pm$ 27   | 38.2 $\pm$ 1.4         |
| <b>SLF</b>     |                           |                |                        |
| Left           | 21924 $\pm$ 0             | 4450 $\pm$ 0   | 65.2 $\pm$ 0           |
| Right          | 21167 $\pm$ 124           | 3711 $\pm$ 36  | 65.0 $\pm$ 0.2         |
| <b>SLF I</b>   |                           |                |                        |
| Left           | 3938 $\pm$ 330            | 645 $\pm$ 73   | 56.4 $\pm$ 1.2         |
| Right          | 8935 $\pm$ 556            | 1251 $\pm$ 68  | 56.2 $\pm$ 0.1         |
| <b>SLF II</b>  |                           |                |                        |
| Left           | 12838 $\pm$ 168           | 2573 $\pm$ 63  | 68.6 $\pm$ 0           |
| Right          | 12353 $\pm$ 434           | 2402 $\pm$ 67  | 69.7 $\pm$ 0.3         |
| <b>SLF III</b> |                           |                |                        |
| Left           | 6818 $\pm$ 0              | 1245 $\pm$ 0   | 62.6 $\pm$ 0           |
| Right          | 1799 $\pm$ 0              | 79.0 $\pm$ 0   | 56.8 $\pm$ 0           |

ARC (arcuate fasciculus), ATR (anterior thalamic radiation), CCA (corticocaudate tract), CCFM (corpus callosum - forceps minor), CCFMBi (corpus callosum - forceps minor, bilateral fibers), CG (cingulum), EC (external capsule), FX (fornix), SLF (superior longitudinal fasciculus system), SLF I (superior longitudinal fasciculus I), SLF II (superior longitudinal fasciculus II), SLF III (superior longitudinal fasciculus III)
