# Supplementary material for: Diffusion tractography reveals pervasive asymmetry of cerebral white matter tracts in the bottlenose dolphin (Tursiops truncatus)
Source: Springer Nature journal article supplement (doi:10.1007/s00429-017-1525-9), 2017-11-30
Supplement: MOESM2 [file 15268904]

**Online Resource 2** Repeated measures mean and standard deviation ( $\pm$  SD) for microstructural tract-specific parameters of fractional anisotropy (FA), mean diffusivity ( $M_D$ ), axial diffusivity ( $A_D$ ), and radial diffusivity ( $R_D$ ) in *T. truncatus* (N=1)

| Tracts      | FA             | $M_D$ ( $\text{mm}^2/\text{s}$ ) | $A_D$ ( $\text{mm}^2/\text{s}$ ) | $R_D$ ( $\text{mm}^2/\text{s}$ ) |                         |
|-------------|----------------|----------------------------------|----------------------------------|----------------------------------|-------------------------|
|             | Mean $\pm$ SD  | Mean $\pm$ SD                    | Mean $\pm$ SD                    | Mean $\pm$ SD                    |                         |
| <b>ARC</b>  |                |                                  |                                  |                                  |                         |
|             | <i>Left</i>    | 0.20 $\pm$ 0                     | 1.91E-04 $\pm$ 0                 | 2.31E-04 $\pm$ 0                 | 1.70E-04 $\pm$ 0        |
|             | <i>Right</i>   | 0.21 $\pm$ 0                     | 1.87E-04 $\pm$ 0                 | 2.29E-04 $\pm$ 0                 | 1.67E-04 $\pm$ 0        |
| <b>ATR</b>  |                |                                  |                                  |                                  |                         |
|             | <i>Left</i>    | 0.28 $\pm$ 0                     | 2.04E-04 $\pm$ 0                 | 2.63E-04 $\pm$ 0                 | 1.74E-04 $\pm$ 1.04E-06 |
|             | <i>Right</i>   | 0.28 $\pm$ 0                     | 2.25E-04 $\pm$ 0                 | 2.92E-04 $\pm$ 0                 | 1.91E-04 $\pm$ 0        |
| <b>CCA</b>  |                |                                  |                                  |                                  |                         |
|             | <i>Left</i>    | 0.24 $\pm$ 0                     | 2.74E-04 $\pm$ 2.52E-06          | 3.43E-04 $\pm$ 2.32E-06          | 2.40E-04 $\pm$ 2.62E-06 |
|             | <i>Right</i>   | 0.23 $\pm$ 0                     | 2.62E-04 $\pm$ 2.54E-06          | 3.25E-04 $\pm$ 3.23E-06          | 2.30E-04 $\pm$ 2.14E-06 |
| <b>CCFM</b> |                |                                  |                                  |                                  |                         |
|             | <b>CCFM</b>    | 0.32 $\pm$ 0                     | 2.12E-04 $\pm$ 0                 | 2.85E-04 $\pm$ 0                 | 1.76E-04 $\pm$ 0        |
|             | <b>CCFMBi</b>  | 0.32 $\pm$ 0                     | 2.08E-04 $\pm$ 0                 | 2.81E-04 $\pm$ 0                 | 1.72E-04 $\pm$ 0        |
| <b>CG</b>   |                |                                  |                                  |                                  |                         |
|             | <i>Left</i>    | 0.23 $\pm$ 0                     | 2.16E-04 $\pm$ 0                 | 2.71E-04 $\pm$ 0                 | 1.89E-04 $\pm$ 0        |
|             | <i>Right</i>   | 0.23 $\pm$ 0                     | 2.26E-04 $\pm$ 0                 | 2.83E-04 $\pm$ 0                 | 1.97E-04 $\pm$ 0        |
| <b>EC</b>   |                |                                  |                                  |                                  |                         |
|             | <i>Left</i>    | 0.28 $\pm$ 0                     | 2.51E-04 $\pm$ 1.80E-06          | 3.26E-04 $\pm$ 2.50E-06          | 2.14E-04 $\pm$ 1.50E-06 |
|             | <i>Right</i>   | 0.23 $\pm$ 0                     | 2.83E-04 $\pm$ 1.70E-06          | 3.53E-04 $\pm$ 2.23E-06          | 2.48E-04 $\pm$ 1.50E-06 |
| <b>FX</b>   |                |                                  |                                  |                                  |                         |
|             |                | 0.18 $\pm$ 0                     | 3.35E-04 $\pm$ 0                 | 3.99E-04 $\pm$ 0                 | 3.03E-04 $\pm$ 0        |
| <b>SLF</b>  |                |                                  |                                  |                                  |                         |
|             | <i>Left</i>    | 0.22 $\pm$ 0                     | 1.80E-04 $\pm$ 0                 | 2.21E-04 $\pm$ 0                 | 1.60E-04 $\pm$ 0        |
|             | <i>Right</i>   | 0.22 $\pm$ 0                     | 1.72E-04 $\pm$ 0                 | 2.14E-04 $\pm$ 0                 | 1.51E-04 $\pm$ 0        |
|             | <b>SLF I</b>   |                                  |                                  |                                  |                         |
|             | <i>Left</i>    | 0.22 $\pm$ 0                     | 1.84E-04 $\pm$ 0                 | 2.29E-04 $\pm$ 1.15E-06          | 1.62E-04 $\pm$ 0        |
|             | <i>Right</i>   | 0.23 $\pm$ 0                     | 1.65E-04 $\pm$ 0                 | 2.05E-04 $\pm$ 0                 | 1.45E-04 $\pm$ 0        |
|             | <b>SLF II</b>  |                                  |                                  |                                  |                         |
|             | <i>Left</i>    | 0.23 $\pm$ 0                     | 1.75E-04 $\pm$ 0                 | 2.18E-04 $\pm$ 0                 | 1.54E-04 $\pm$ 0        |
|             | <i>Right</i>   | 0.23 $\pm$ 0                     | 1.74E-04 $\pm$ 0                 | 2.17E-04 $\pm$ 0                 | 1.53E-04 $\pm$ 0        |
|             | <b>SLF III</b> |                                  |                                  |                                  |                         |
|             | <i>Left</i>    | 0.18 $\pm$ 0                     | 1.88E-04 $\pm$ 0                 | 2.23E-04 $\pm$ 0                 | 1.70E-04 $\pm$ 0        |
|             | <i>Right</i>   | 0.18 $\pm$ 0                     | 2.03E-04 $\pm$ 0                 | 2.42E-04 $\pm$ 0                 | 1.84E-04 $\pm$ 0        |

ARC (arcuate fasciculus), ATR (anterior thalamic radiation), CCA (corticocaudate tract), CCFM (corpus callosum - forceps minor), CCFMBi (corpus callosum - forceps minor, bilateral fibers), CG (cingulum), EC (external capsule), FX (fornix), SLF (superior longitudinal fasciculus system), SLF I (superior longitudinal fasciculus I), SLF II (superior longitudinal fasciculus II), SLF III (superior longitudinal fasciculus III)
